# Supplementary material for: Investigation of Electron Transfer Mechanistic Pathways of Ferrocene Derivatives in Droplet at Carbon Electrode
Source: MDPI journal article supplement (doi:10.3390/c8030045), 2022-09-09
Supplement: s1 [file s1]

Supplementary data

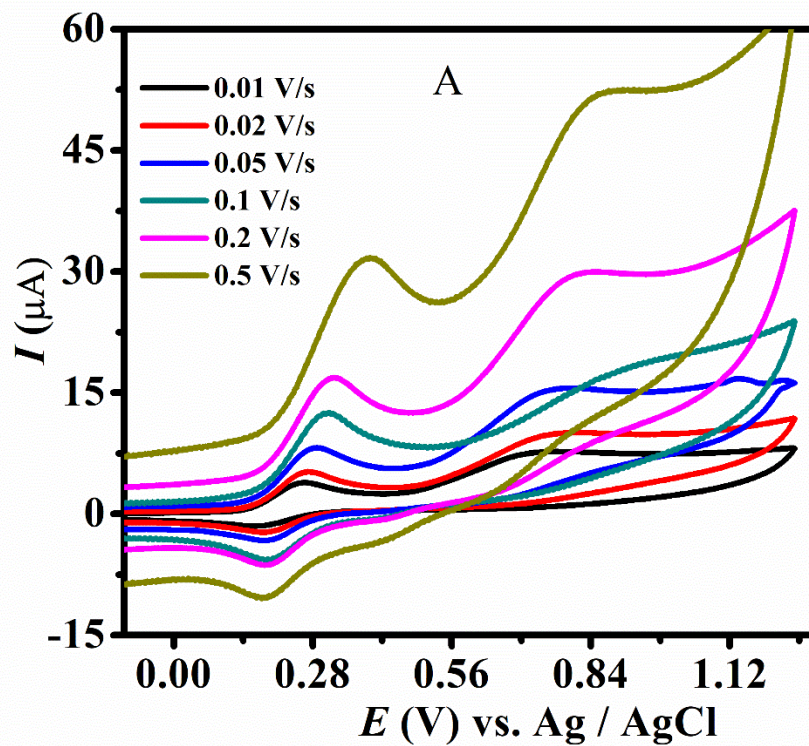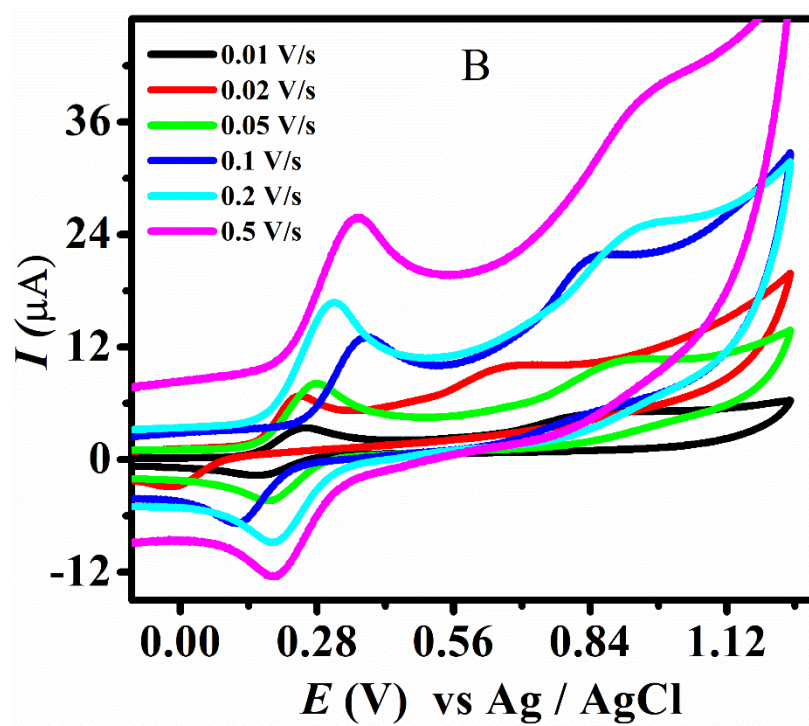

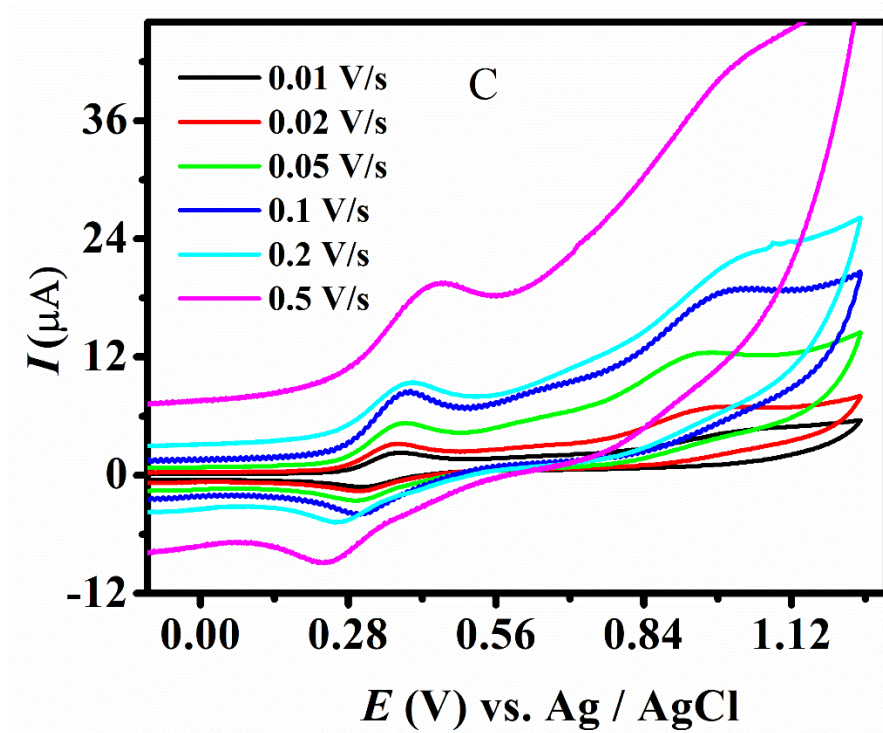

Figure S1. Effect of scan rate using cyclic voltammetry for (A) FMA (B) CFA (C) FA.

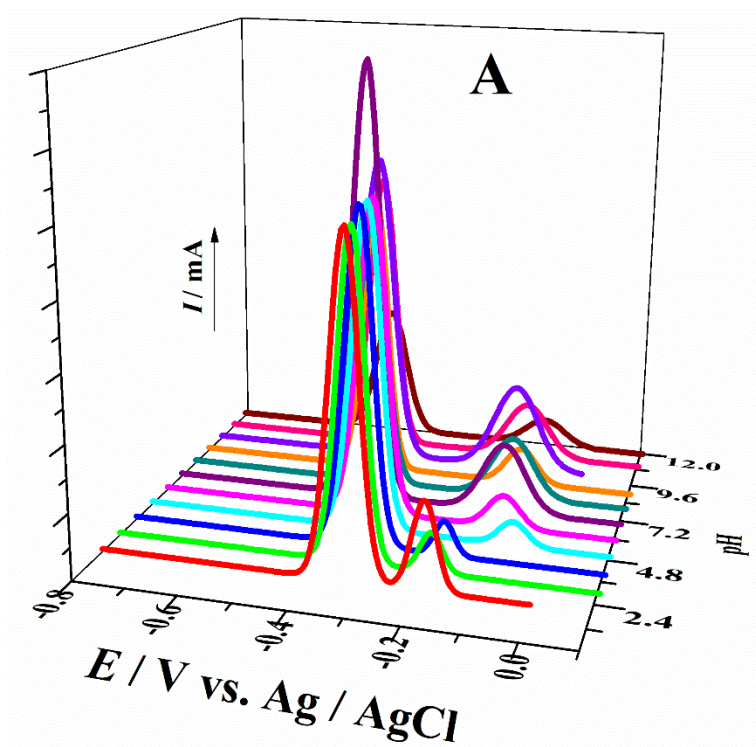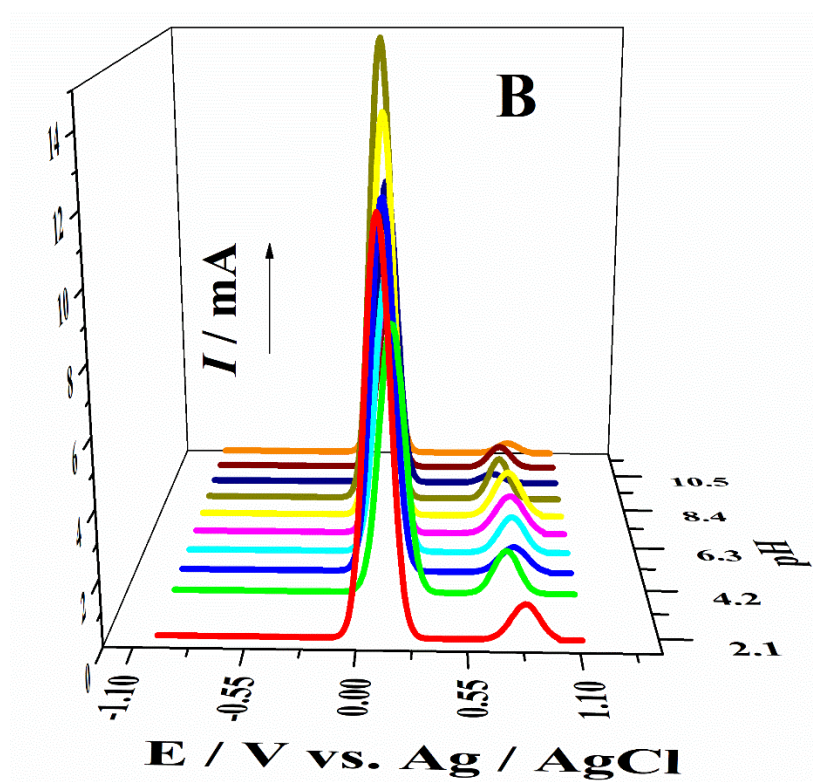

Figure S2. DPV of (A) CFA and (B) FA at various pH values.

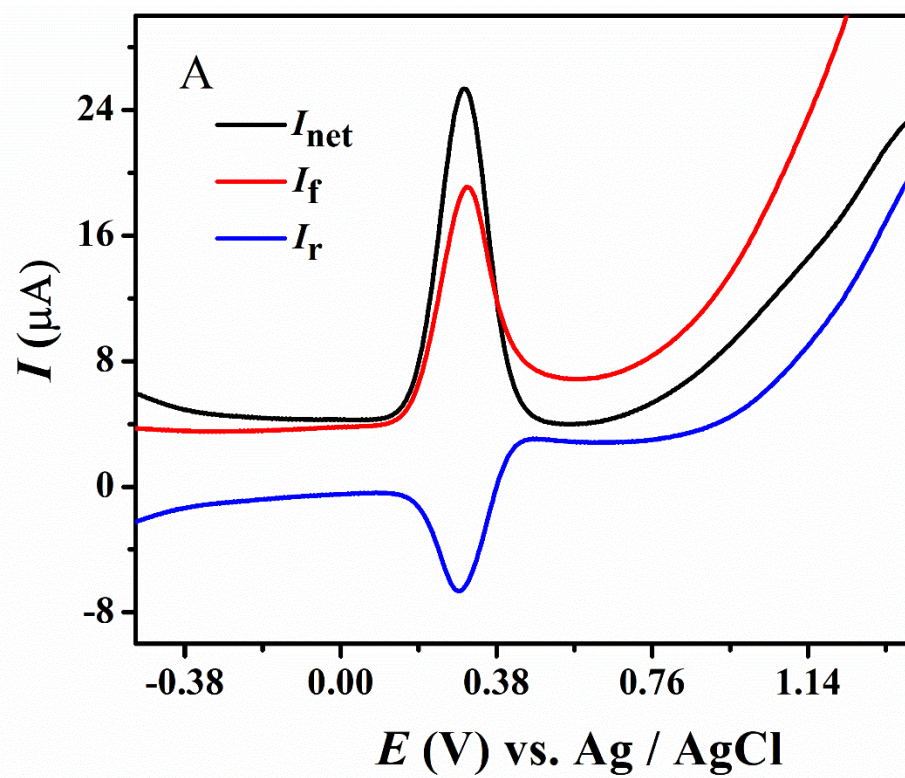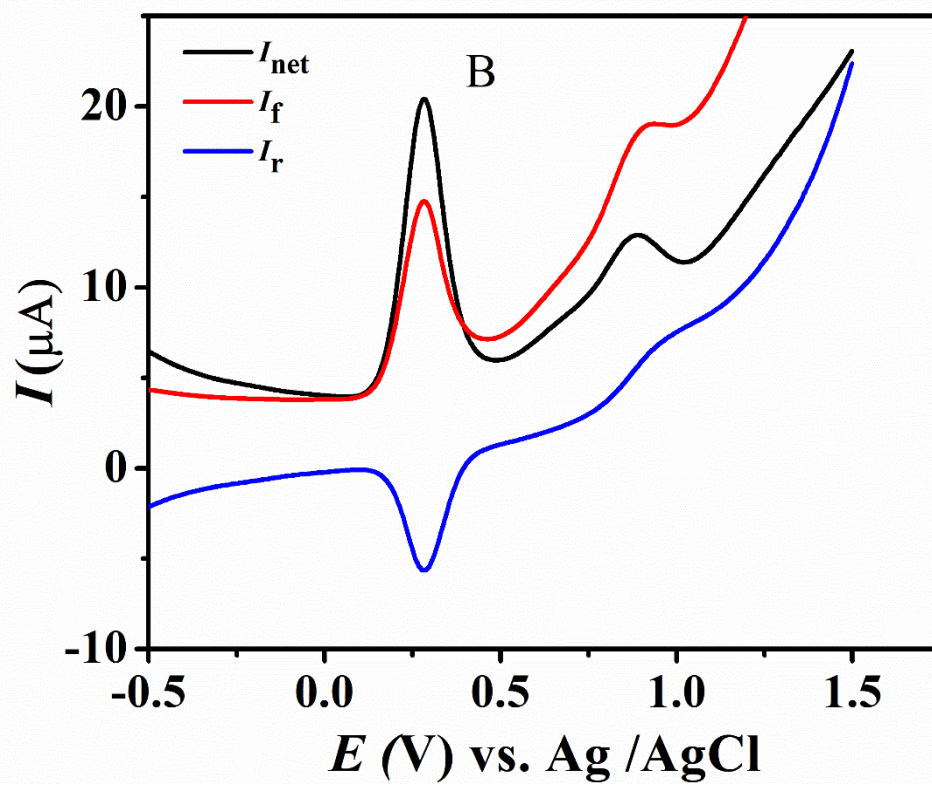

Figure S3. SWV of (A) CFA and (B) FA.

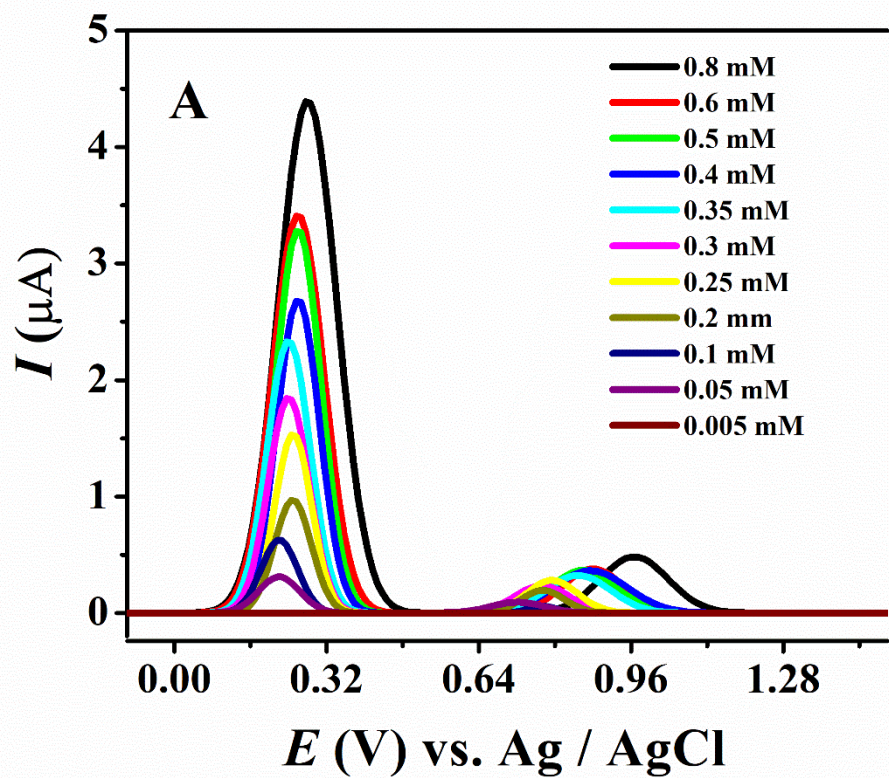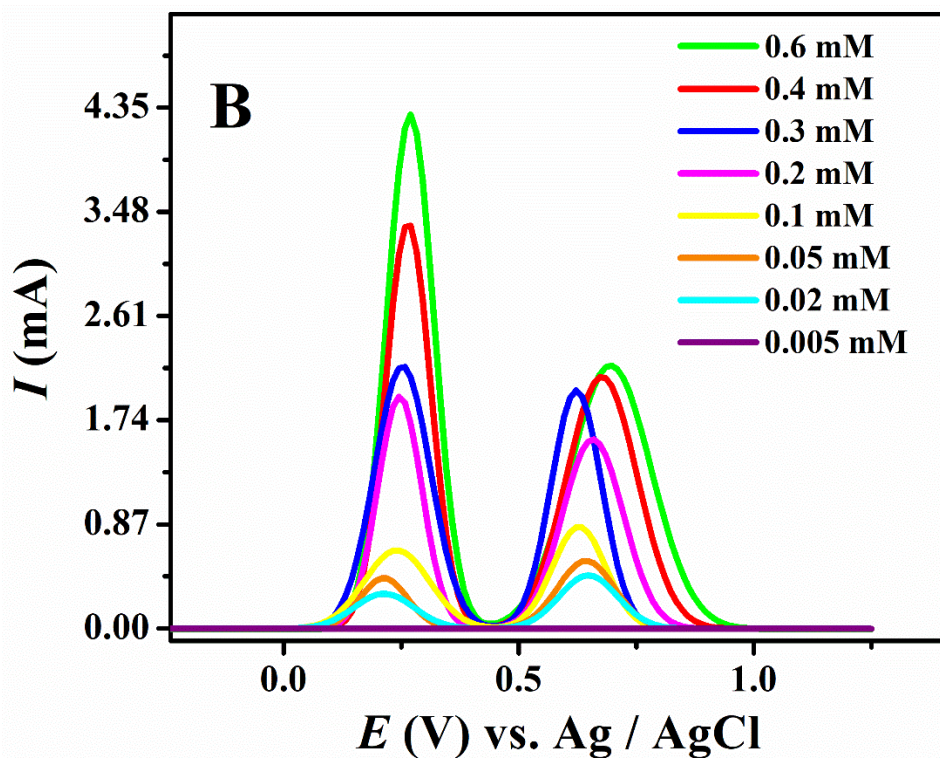

Figure S4. Concentration effect of (A) CFA and (B) FMA studied using SWV to determine LOQ and LOD.
